# Supplementary material for: A reconfigurable ultra-broadband transparent absorber combined with ITO and structural water
Source: Royal Society of Chemistry journal article supplement (doi:10.1039/d3nr02666c), 2023-01-01
Supplement: d3nr02666c1.pdf [file d3nr02666c1.pdf]

The detail fabrication process of the experimental sample is shown below:

### 1. PDMS pre-processing

1.1 Weigh 22g of PDMS glue (20g of A-glue, 2g of B-glue, A-glue: B-glue=10:1) into a disposable cup of water and stir to mix.

### 2. Defoaming (vacuum defoaming)

2.1 Place the mixed PDMS glue into a vacuum defoamer and vacuum exhaust to remove air bubbles from the mixture.

### 3. Pouring

3.1 Place the mold in which the chips are to be prepared in an acrylic mold;

3.2 The defoamed PDMS was slowly introduced into the pouring tray and left to stand for 10 min;

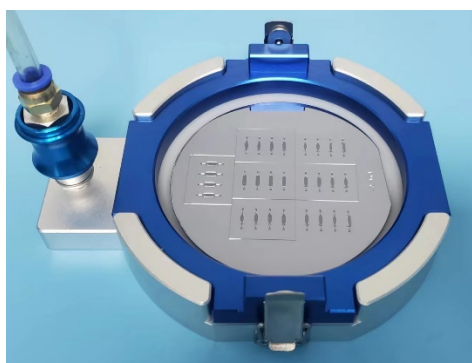

### 4. Drying

4.1 Place the casting trays in an oven for hot drying, usually at 70°C - 80°C for half an hour to harden the PDMS.

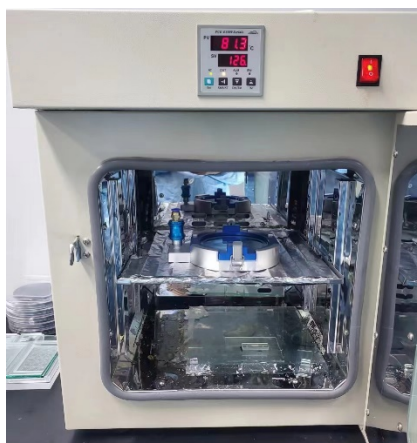

### 5. PDMS separation

5.1 Remove the dried PDMS chip from the tray and carefully separate the mold from the PDMS.

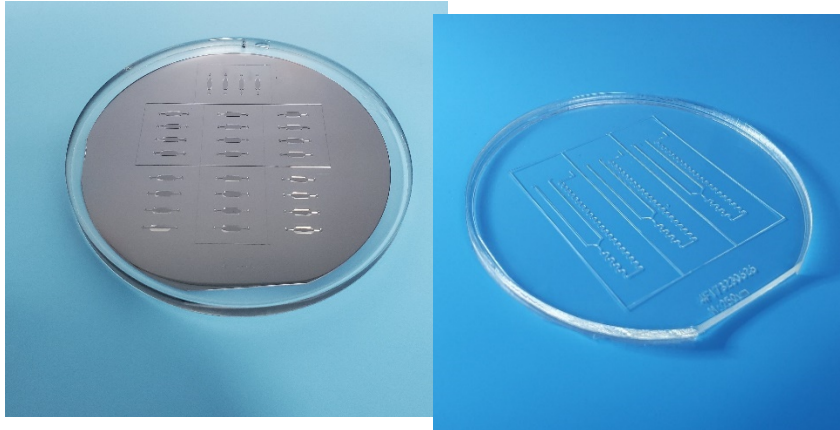

SU8 Mold + PDMS

PDMS after demolding

## 6. Cutting and hole preparation

6.1 Using a dicer, prepare PDMS chips of the desired size by cutting them as needed.

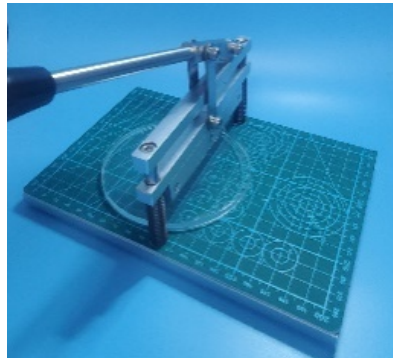

PDMS cutting

6.2 Using a hole punch, make the required holes in the chip for fluid inlet and outlet.

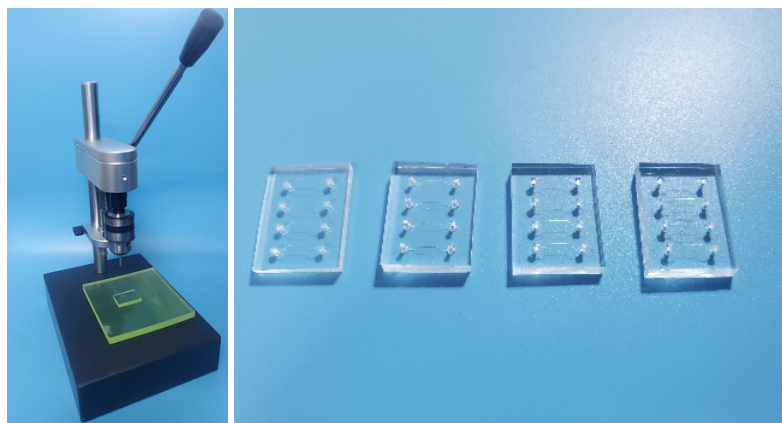

Perforation

PDMS after cutting and punching

## 7. PDMS bonding

7.1 The prepared PDMS chip is treated with tape for surface dust;

7.2 The glass substrate is cleaned to ensure that the surface is clean and dust free.

7.3 Processed PDMS chip and glass on a tray, placed in plasma for surface

treatment (power 80w, time 30s)

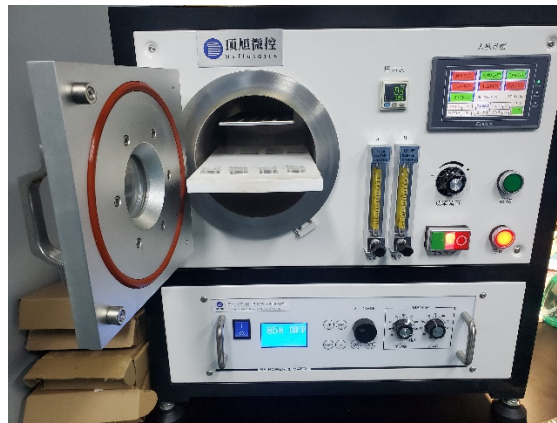

7.4 Quickly laminate the processed PDMS chip and glass, put it into the oven, 85°C, 30min, and take it out.

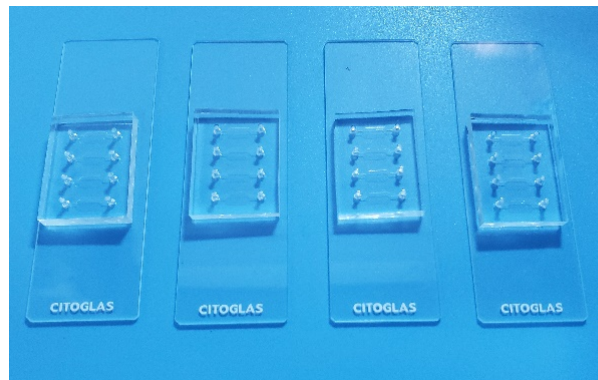

Molded PDMS chips
